# Supplementary material
Source: publisher figshare collection journal article supplement (https://gsajournals.figshare.com/ndownloader/files/12349472)
Supplement: Supplementary file 1 [file 12349472]

## Sheet: Sheet1
SIP Line	Sex	Number of flies	Day bout number	Day sleep (min.)	Night bout number	Night sleep (min.)	24-hour sleep (min.)	Waking activity (cts./min.)	Sleep latency (min.)	Day avg. bout length (min.)	Night avg. bout length (min.)
SIP_L1_1	Combined	62	17.5605	464.552	6.55645	687.073	1151.62	1.66337	11.2097	40.0657	328.612
SIP_L1_2	Combined	64	16.7109	484.379	5.39844	695.312	1179.69	1.57126	10.8711	45.1618	331.855
SIP_L1_3	Combined	62	18.2097	395.71	5.68145	689.855	1085.56	1.62591	12.6815	28.8177	325.794
SIP_L1_4	Combined	64	18.8203	448.648	7.30469	681.566	1130.21	1.59502	11.8672	32.8268	304.653
SIP_L1_5	Combined	62	18.7097	477.581	7.02016	684.262	1161.84	1.66106	10.8145	43.3177	321.171
SIP_L1_6	Combined	59	18.2076	479.089	4.71186	693.847	1172.94	1.61704	10.6483	43.7464	363.029
SIP_L1_7	Combined	62	20.2823	437.972	7.14113	677.069	1115.04	1.44048	13.7298	29.4866	304.261
SIP_L1_8	Combined	58	21.8534	489.918	8.82328	675.44	1165.36	1.61915	11.1681	33.2653	221.442
SIP_L1_9	Combined	63	18.0119	492.401	5.33333	697.139	1189.54	1.65156	9.11111	37.9738	324.06
SIP_L1_10	Combined	64	15.9023	419.633	7.44531	681.895	1101.53	1.59414	11.9609	46.6946	297.238
SIP_L2_1	Combined	63	26.2659	357.631	13.5952	620.135	977.766	1.26942	18.8571	15.3464	94.4866
SIP_L2_2	Combined	61	24.0943	412.111	9.97541	656.775	1068.89	1.39277	13.9057	35.363	170.672
SIP_L2_3	Combined	64	23.8438	461.527	6.62891	680.625	1142.15	1.54296	11.6758	31.1507	225.211
SIP_L2_4	Combined	63	22.6905	542.361	8.75397	673.833	1216.19	1.45665	8.73016	32.7734	208.141
SIP_L2_5	Combined	61	24.5451	402.43	10.1639	642.295	1044.73	1.33176	15.9016	22.2987	143.17
SIP_L2_6	Combined	64	22.7695	484.086	7.01953	671.551	1155.64	1.26108	14.7148	31.7128	228.198
SIP_L2_7	Combined	64	21.4648	454.676	6.68359	671.355	1126.03	1.31191	15.9023	28.5659	240.828
SIP_L2_8	Combined	64	22.6953	438.453	6.10547	672.102	1110.55	1.34564	16.0469	25.9979	216.986
SIP_L2_10	Combined	64	21.9648	530.633	5.75	685.109	1215.74	1.30027	10.9961	31.8852	256.367
SIP_S1_1	Combined	64	7.07422	85.3555	13.25	205.488	290.844	1.89898	161.633	10.9009	18.3905
SIP_S1_2	Combined	61	13.5287	145.508	9.85246	178.094	323.602	1.93796	236.84	10.3048	19.9459
SIP_S1_3	Combined	63	12.881	207.317	10.3294	230.901	438.218	2.00711	203.877	22.3318	32.7386
SIP_S1_4	Combined	56	16.8973	306.25	11.5848	299.071	605.321	1.45178	176.576	25.0288	41.8651
SIP_S1_5	Combined	61	17.2787	274.848	10.8525	319.697	594.545	1.41307	153.393	20.9913	36.8926
SIP_S1_6	Combined	63	15.3611	182.341	13.5079	264.845	447.187	1.54632	151.96	11.2899	24.9027
SIP_S1_7	Combined	58	14.9095	178.901	12.1034	210.052	388.953	1.69981	195.078	11.6534	17.4638
SIP_S1_8	Combined	61	16.1598	308.316	10.9467	385.611	693.926	1.58632	144.525	21.7002	57.1957
SIP_S1_9	Combined	60	16.3917	213.963	14.1333	212.104	426.067	1.59807	165.492	13.0368	16.4218
SIP_S1_10	Combined	60	14.9125	177.679	10.8708	192.037	369.717	1.58004	215.042	13.0005	21.9095
SIP_S2_1	Combined	59	10.8771	124.407	8.77119	101.008	225.415	1.88332	290.141	9.98098	9.40686
SIP_S2_2	Combined	61	11.832	142.607	6.62705	70.1475	212.754	1.87755	306.96	11.163	8.82358
SIP_S2_3	Combined	60	14.925	203.95	8.13333	104.067	308.017	1.96611	236.032	13.3944	11.4297
SIP_S2_4	Combined	60	15.425	242.188	7.82083	149.425	391.613	1.84635	248.523	14.9045	19.1595
SIP_S2_5	Combined	57	12.2018	177.64	8.23684	107.846	285.487	1.98952	285.244	13.2401	15.1697
SIP_S2_6	Combined	56	12.3482	162.482	8.47321	99.4152	261.897	1.90854	269.198	12.0473	9.75978
SIP_S2_7	Combined	63	11.8056	147.865	6.81349	85.4048	233.27	1.74313	280.176	13.5165	15.9061
SIP_S2_8	Combined	62	10.0645	113.625	6.20968	68.6089	182.234	1.93799	314.25	9.88769	10.3707
SIP_S2_9	Combined	62	10.2823	131.633	7.94355	79.7056	211.339	1.88333	255.19	11.2856	9.11162
SIP_S2_10	Combined	63	15.8016	222.52	11.8056	159.885	382.405	1.84742	201.11	14.4489	15.7636
SIP_L1_1	Female	31	22.2903	364.153	7.45161	685.847	1050	1.366	9.20161	17.8381	312.742
SIP_L1_2	Female	32	22.6016	387.203	8.04688	682.727	1069.93	1.38246	13.5781	19.4943	207.033
SIP_L1_3	Female	31	21.3468	281.968	7.10484	681.056	963.024	1.51587	13.4355	14.8675	323.77
SIP_L1_4	Female	32	24.1094	381.836	10.5312	665.359	1047.2	1.37477	11.6953	16.8931	227.737
SIP_L1_5	Female	31	22.1532	415.032	8.96774	672.831	1087.86	1.62203	11.4919	23.2819	297.805
SIP_L1_6	Female	30	23.575	413.317	5.95	687.192	1100.51	1.37541	11.2917	19.5773	324.611
SIP_L1_7	Female	30	26.6333	359.45	9.66667	666.717	1026.17	1.2933	13.2333	14.1394	204.477
SIP_L1_8	Female	31	27.4113	431.879	10.7661	668.798	1100.68	1.42259	9.30645	17.6796	185.421
SIP_L1_9	Female	32	23.0859	409.695	6.36719	694.867	1104.56	1.41892	8.64062	19.0601	317.037
SIP_L1_10	Female	32	19.5156	321.602	8.61719	673.922	995.523	1.39077	14.9766	33.7838	230.24
SIP_L2_1	Female	32	31.2109	322.859	12.1875	628.984	951.844	1.1034	18.3828	10.4989	131.133
SIP_L2_2	Female	31	30.0242	326.371	10.0968	656.145	982.516	1.19782	17.1855	10.9733	151.758
SIP_L2_3	Female	32	31.1875	414.492	8.20312	667.656	1082.15	1.3498	14.4922	15.0371	192.16
SIP_L2_4	Female	31	25.2097	543.726	4.91935	699.468	1243.19	1.4764	5.30645	33.0166	330.269
SIP_L2_5	Female	31	29.9516	346.758	10.5968	633.323	980.081	1.16936	18.2903	12.2717	152.312
SIP_L2_6	Female	32	27.0781	481.766	5.625	693.617	1175.38	1.07048	8.36719	31.0781	324.386
SIP_L2_7	Female	32	25.2344	452.789	5.125	684.953	1137.74	1.12025	14.9375	24.2907	328.937
SIP_L2_8	Female	32	29.9062	411.367	5.74219	682.438	1093.8	1.05986	11.9062	15.014	235.068
SIP_L2_10	Female	32	25.8828	515.719	4.35938	701	1216.72	1.20743	5.71875	27.8844	330.001
SIP_S1_1	Female	32	6.10938	50.3438	15.4375	201.867	252.211	1.62675	151.18	7.18891	13.6417
SIP_S1_2	Female	30	13.05	112.192	12.0417	196.25	308.442	1.71469	177.975	7.87411	19.7504
SIP_S1_3	Female	31	11.1935	132.726	12.9919	257.234	389.96	1.66092	158.097	21.764	30.4404
SIP_S1_4	Female	27	19.1852	240.019	15.4815	383.972	623.991	1.14003	93.7037	20.4888	54.5774
SIP_S1_5	Female	31	17.2258	193.984	12.2742	382.782	576.766	1.28884	108.887	12.1534	43.289
SIP_S1_6	Female	32	13.4922	130.219	15.8359	292.867	423.086	1.28784	102.688	9.04644	20.9726
SIP_S1_7	Female	26	12.0481	98.5192	14.6154	225.894	324.413	1.47796	150.106	7.84568	14.5615
SIP_S1_8	Female	30	16.8667	228.692	11.9417	462.017	690.708	1.34487	95.9583	14.03	78.7284
SIP_S1_9	Female	29	14.5603	127.414	16.0086	195.362	322.776	1.23575	128.422	8.74123	12.7365
SIP_S1_10	Female	28	15.4286	132.205	12.9911	177.241	309.446	1.21175	168.991	8.16524	13.1223
SIP_S2_1	Female	27	7.57407	64.7222	10.287	110.722	175.444	1.80789	255.574	7.45985	9.51344
SIP_S2_2	Female	29	9.94828	85.25	7.63793	75.6638	160.914	1.64811	253.527	7.71829	8.08831
SIP_S2_3	Female	29	14.431	162.319	10.1121	121.112	283.431	1.61324	184.618	10.7191	10.7998
SIP_S2_4	Female	31	12.4597	139.637	6.40323	83.7016	223.339	1.72878	257.908	9.87216	11.8671
SIP_S2_5	Female	26	9.72115	92.4615	11.1154	140.163	232.625	1.64135	211.894	8.45303	19.9202
SIP_S2_6	Female	26	10.1538	95.0481	9.11538	108.837	203.885	1.68963	244.535	8.33084	9.368
SIP_S2_7	Female	32	9.33594	78.8828	6.61719	65.8516	144.734	1.63936	254.494	7.49358	8.65299
SIP_S2_8	Female	30	6.91667	62.6167	6.69167	64.2583	126.875	1.77333	264.943	7.3936	8.84976
SIP_S2_9	Female	31	5.06452	41.7177	8.78226	80.371	122.089	1.84108	211.551	7.74861	8.31248
SIP_S2_10	Female	31	15.1532	156.702	15	169.984	326.685	1.53902	149.809	9.07505	10.4132
SIP_L1_1	Male	31	12.8306	564.952	5.66129	688.298	1253.25	1.96074	13.2177	62.2933	344.483
SIP_L1_2	Male	32	10.8203	581.555	2.75	707.898	1289.45	1.76006	8.16406	70.8292	456.678
SIP_L1_3	Male	31	15.0726	509.452	4.25806	698.653	1208.1	1.73596	11.9274	42.7678	327.817
SIP_L1_4	Male	32	13.5312	515.461	4.07812	697.773	1213.23	1.81528	12.0391	48.7604	381.57
SIP_L1_5	Male	31	15.2661	540.129	5.07258	695.694	1235.82	1.70008	10.1371	63.3534	344.537
SIP_L1_6	Male	29	12.6552	547.129	3.43103	700.733	1247.86	1.86701	9.98276	68.7488	402.77
SIP_L1_7	Male	32	14.3281	511.586	4.77344	686.773	1198.36	1.57846	14.1953	43.8746	397.808
SIP_L1_8	Male	27	15.4722	556.556	6.59259	683.065	1239.62	1.84483	13.3056	51.1601	262.799
SIP_L1_9	Male	31	12.7742	577.774	4.26613	699.484	1277.26	1.89169	9.59677	57.4977	331.31
SIP_L1_10	Male	32	12.2891	517.664	6.27344	689.867	1207.53	1.79751	8.94531	59.6054	364.237
SIP_L2_1	Male	31	21.1613	393.524	15.0484	611	1004.52	1.44079	19.3468	20.3502	56.6582
SIP_L2_2	Male	30	17.9667	500.708	9.85	657.425	1158.13	1.59421	10.5167	60.5657	190.216
SIP_L2_3	Male	32	16.5	508.562	5.05469	693.594	1202.16	1.73612	8.85938	47.2644	258.261
SIP_L2_4	Male	32	20.25	541.039	12.4688	649	1190.04	1.43752	12.0469	32.5377	89.8303
SIP_L2_5	Male	30	18.9583	459.958	9.71667	651.567	1111.53	1.49958	13.4333	32.66	133.723
SIP_L2_6	Male	32	18.4609	486.406	8.41406	649.484	1135.89	1.45168	21.0625	32.3474	132.01
SIP_L2_7	Male	32	17.6953	456.562	8.24219	657.758	1114.32	1.50357	16.8672	32.8412	152.719
SIP_L2_8	Male	32	15.4844	465.539	6.46875	661.766	1127.3	1.63142	20.1875	36.9819	198.904
SIP_L2_10	Male	32	18.0469	545.547	7.14062	669.219	1214.77	1.3931	16.2734	35.886	182.732
SIP_S1_1	Male	32	8.03906	120.367	11.0625	209.109	329.477	2.17121	172.086	14.6129	23.1393
SIP_S1_2	Male	31	13.9919	177.75	7.73387	160.524	338.274	2.15402	293.806	12.6571	20.1349
SIP_S1_3	Male	32	14.5156	279.578	7.75	205.391	484.969	2.34248	248.227	22.882	34.9649
SIP_S1_4	Male	29	14.7672	367.914	7.9569	220.026	587.94	1.74203	253.733	29.2556	30.0296
SIP_S1_5	Male	30	17.3333	358.408	9.38333	254.508	612.917	1.54144	199.383	30.1238	30.283
SIP_S1_6	Male	31	17.2903	236.145	11.1048	235.919	472.065	1.81314	202.823	13.6057	29.0949
SIP_S1_7	Male	32	17.2344	244.211	10.0625	197.18	441.391	1.88006	231.617	14.7471	19.8981
SIP_S1_8	Male	31	15.4758	385.371	9.98387	311.669	697.04	1.81998	191.524	29.123	36.3577
SIP_S1_9	Male	31	18.1048	294.927	12.379	227.766	522.694	1.93701	200.169	17.0552	19.8693
SIP_S1_10	Male	32	14.4609	217.469	9.01562	204.984	422.453	1.90229	255.336	17.2314	29.8464
SIP_S2_1	Male	32	13.6641	174.766	7.49219	92.8125	267.578	1.94697	319.307	12.0294	9.31404
SIP_S2_2	Male	32	13.5391	194.586	5.71094	65.1484	259.734	2.08548	356.831	14.2848	9.53348
SIP_S2_3	Male	31	15.3871	242.895	6.28226	88.121	331.016	2.2962	287.445	15.8972	12.0595
SIP_S2_4	Male	29	18.5948	351.81	9.33621	219.681	571.491	1.97202	238.813	20.284	26.7034
SIP_S2_5	Male	31	14.2823	249.081	5.82258	80.7419	329.823	2.28153	346.763	17.2551	11.0525
SIP_S2_6	Male	30	14.25	220.925	7.91667	91.25	312.175	2.09827	292.948	15.2683	10.137
SIP_S2_7	Male	31	14.3548	219.073	7.01613	105.589	324.661	1.85025	304.202	19.7337	23.1593
SIP_S2_8	Male	32	13.0156	161.445	5.75781	72.6875	234.133	2.09236	360.376	12.2259	11.7395
SIP_S2_9	Male	31	15.5	221.548	7.10484	79.0403	300.589	1.92558	300.283	14.4802	9.91075
SIP_S2_10	Male	32	16.4297	286.281	8.71094	150.102	436.383	2.14619	250.807	19.6547	20.9468
